# Supplementary material
Source: PubMed Central journal article supplement (PMC8609759)
Supplement: mmc1.pdf [file mmc1.pdf]

## Supporting Information

### Molecular interactions in remdesivir-cyclodextrin systems

Bianka Várnai<sup>1</sup>, Milo Malanga<sup>2</sup>, Tamás Sohajda<sup>2</sup>, Szabolcs Béni<sup>1\*</sup>

<sup>1</sup>Semmelweis University, Department of Pharmacognosy, Üllői út. 26, H-1085 Budapest, Hungary

<sup>2</sup>CycloLab, Cyclodextrin R&D Ltd, Budapest, H-1097 Illatos út 7, Hungary.

\*Corresponding author. E-mail address: [beni.szabolcs@pharma.semmelweis-univ.hu](mailto:beni.szabolcs@pharma.semmelweis-univ.hu)

Phone number: +36 1 317 2979

NMR measurements were carried out on a 600 and a 400 MHz Varian DDR NMR spectrometer (Agilent Technologies, Palo Alto, CA, USA), equipped with a 5 mm inverse-detection probehead and a gradient module at 298 K. Standard pulse sequences and processing routines available in VnmrJ 3.2C/Chempack 5.1 and MestreNova 14.2.0 were used.

$^1\text{H}$  NMR spectra for the Job's plot and the titration were recorded with 16 scans with a spectral window of 5.1 kHz and a 2 s relaxation delay. The complete resonance assignment of remdesivir were established from 1D  $^1\text{H}$  (16 scans, 2 s relaxation delay, 6 kHz spectral window) and  $^{13}\text{C}$  (30000 scans, 1 s relaxation delay, 33.8 kHz spectral width), 2D  $^1\text{H}$ - $^1\text{H}$  gCOSY (4 scans were collected on 1024·512 data points, 1 s relaxation delay), NOESY (8 scans were collected on 1024·512 data points with a mixing time of 300 ms),  $^1\text{H}$ - $^{13}\text{C}$  gHSQCAD (4 scans, 1 s relaxation delay,  $^1J_{\text{CH}} = 140$  Hz, spectral width of F1 = 6 kHz, F2 = 27.1 kHz) and HMBC (4 scans, 1 s relaxation delay,  $^3J_{\text{CH}} = 8$  Hz, spectral width of F1 = 6 kHz, F2 = 32.5 kHz) experiments, both in DMSO- $d_6$  (ref.  $\delta = 2.50$ ) and D $_2$ O, pH = 2.0 (ref. methyl singlet  $\delta = 3.31$  ppm of internal CH $_3$ OH). Complete resonance assignments of cyclodextrins were established from 1D  $^1\text{H}$  (64 scans, 1 s relaxation delay, 2.4 kHz spectral window) and 2D-2D  $^1\text{H}$ - $^1\text{H}$  gCOSY (4 scans were collected on 1024·512 data points, 1 s relaxation delay),  $^1\text{H}$ - $^{13}\text{C}$  gHSQCAD (4 scans, 1 s relaxation delay,  $^1J_{\text{CH}} = 140$  Hz, spectral width of F1 = 2.4 kHz, F2 = 12 kHz) and HMBC (8 scans, 1 s relaxation delay,  $^3J_{\text{CH}} = 8$  Hz, spectral width of F1 = 2.4 kHz, F2 = 19 kHz) experiments. To explore spatial proximity of the host-guest complexes 2D ROESY spectra were acquired with spectral width of 5.4 kHz collecting 16 and 32 scans on 1258·512 data points, applying mixing times of 300 and 400 ms.

**Table 1.** Complete  $^1\text{H}$  NMR resonances assignment for remdesivir (in  $\text{DMSO-}d_6$  and in  $\text{D}_2\text{O}$  at pH 2.0, 600 MHz).

| No.   | $^1\text{H}$                                                              |                                                                               |
|-------|---------------------------------------------------------------------------|-------------------------------------------------------------------------------|
|       | <b>DMSO-<math>d_6</math></b><br>(ref. DMSO $\delta_{\text{H}}= 2.50$ ppm) | <b>D<math>_2</math>O pH 2.0</b><br>(ref. MeOH $\delta_{\text{H}} = 3.31$ ppm) |
| 1     | 6.82 (d, $J = 4.5$ Hz, 1H)                                                | 7.00 (d, $J = 4.9$ Hz, 1H)                                                    |
| 2     | 6.88 (d, $J = 4.5$ Hz, 1H)                                                | 7.23 (d, $J = 4.9$ Hz, 1H)                                                    |
| 3     | 4.63 (m, 1H)                                                              | 4.87 (m, 1H)                                                                  |
| 4     | 3.94 (m, 1H)                                                              | 4.42 (m, 1H)                                                                  |
| 5     | 4.23 (m, 1H)                                                              | 4.52 (m, 1H)                                                                  |
| 6     | 4.08 (m, 1H)                                                              | 4.24 (m, 1H)                                                                  |
| 6'    | 4.25 (m, 1H)                                                              | 4.38 (m, 1H)                                                                  |
| 7-8   | 7.34 (m, 2H)                                                              | 6.88 (d, $J = 8.0$ Hz, 2H)                                                    |
| 9-10  | 7.18 (m, 2H)                                                              | 7.28 (t, $J = 7.8$ Hz, 2H)                                                    |
| 11    | 7.16 (m, 1H)                                                              | 7.18 (t, $J = 7.5$ Hz, 2H)                                                    |
| 12    | 3.81 (m, 1H)                                                              | 3.69 (m, 1H)                                                                  |
| 13    | 1.20 (d, $J = 7.1$ Hz, 3H)                                                | 1.26 (d, $J = 7.4$ , 3H)                                                      |
| 14    | 3.86 (dd, $J = 10.9$ Hz, 5.7 Hz, 1H)                                      | 3.94 (dd, $J = 10.8$ Hz, 5.7 Hz, 1H)                                          |
| 14'   | 3.95 (dd, $J = 10.9$ Hz, 5.7 Hz, 1H)                                      | 4.01 (dd, $J = 10.8$ Hz, 5.7 Hz, 1H)                                          |
| 15    | 1.41 (m, 1H)                                                              | 1.45 (m, 4H)                                                                  |
| 16-17 | 1.24 (m, 4H)                                                              | 1.25 (m, 4H)                                                                  |
| 18-19 | 0.79 (t, $J = 7.4$ Hz, 6H)                                                | 0.80 (t, $J = 7.5$ Hz, 6H)                                                    |
| 20    | 7.92 (s, 1H)                                                              | 7.95 (s, 1H)                                                                  |

**Table 2.** Complete <sup>1</sup>H NMR resonance assignment for cyclodextrins (D<sub>2</sub>O at pH 2.0, ref. MeOH δ<sub>H</sub> = 3.31 ppm, 400 MHz).

| No. | βCD                                   | γCD                                   | per-6-SBE-βCD                   | Sugammadex                            |
|-----|---------------------------------------|---------------------------------------|---------------------------------|---------------------------------------|
| 1   | 5.03 (d, <i>J</i> = 3.7 Hz, 1H)       | 5.07 (d, <i>J</i> = 3.9 Hz, 1H)       | 5.01 (d, <i>J</i> = 3.7 Hz, 1H) | 5.12 (d, <i>J</i> = 3.8 Hz, 1H)       |
| 2   | 3.61 (dd, <i>J</i> = 9.9, 3.6 Hz, 1H) | 3.61 (dd, <i>J</i> = 9.8, 3.8 Hz, 1H) | 3.60 (m, 1H)                    | 3.63 (dd, <i>J</i> = 9.9, 3.7 Hz, 1H) |
| 3   | 3.93 (t, <i>J</i> = 9.5 Hz, 1H)       | 3.90 (t, <i>J</i> = 9.6 Hz, 1H)       | 3.91 (m, 1H)                    | 3.88 (t, <i>J</i> = 9.5 Hz, 1H)       |
| 4   | 3.55 (t, <i>J</i> = 9.3 Hz, 1H)       | 3.55 (t, <i>J</i> = 9.4 Hz, 1H)       | 3.62 (m, 1H)                    | 3.52 (t, <i>J</i> = 9.3 Hz, 1H)       |
| 5   | 3.82 (m, 1H)                          | 3.82 (m, 1H)                          | 3.90 (m, 1H)                    | 3.97 (t, <i>J</i> = 9.1 Hz, 1H)       |
| 6   |                                       |                                       | 3.71 (m, 1H)                    | 3.23 (m, 1H)                          |
| 6'  | 3.84 (m, 2H)                          | 3.83 (m, 2H)                          | 3.80 (m, 1H)                    | 2.91 (m, 1H)                          |
| 7   | -                                     | -                                     | 3.60 (m, 1H)                    |                                       |
| 7'  | -                                     | -                                     | 3.52 (m, 1H)                    | 2.89 (t, <i>J</i> = 7.2 Hz, 2H)       |
| 8   | -                                     | -                                     |                                 |                                       |
| 8'  | -                                     | -                                     | 1.69 (m, 2H)                    | 2.70 (t, <i>J</i> = 7.2 Hz, 2H)       |
| 9   | -                                     | -                                     |                                 | -                                     |
| 9'  | -                                     | -                                     | 1.76 (m, 2H)                    | -                                     |
| 10  | -                                     | -                                     |                                 | -                                     |
| 10' | -                                     | -                                     | 2.90 (m, 2H)                    | -                                     |

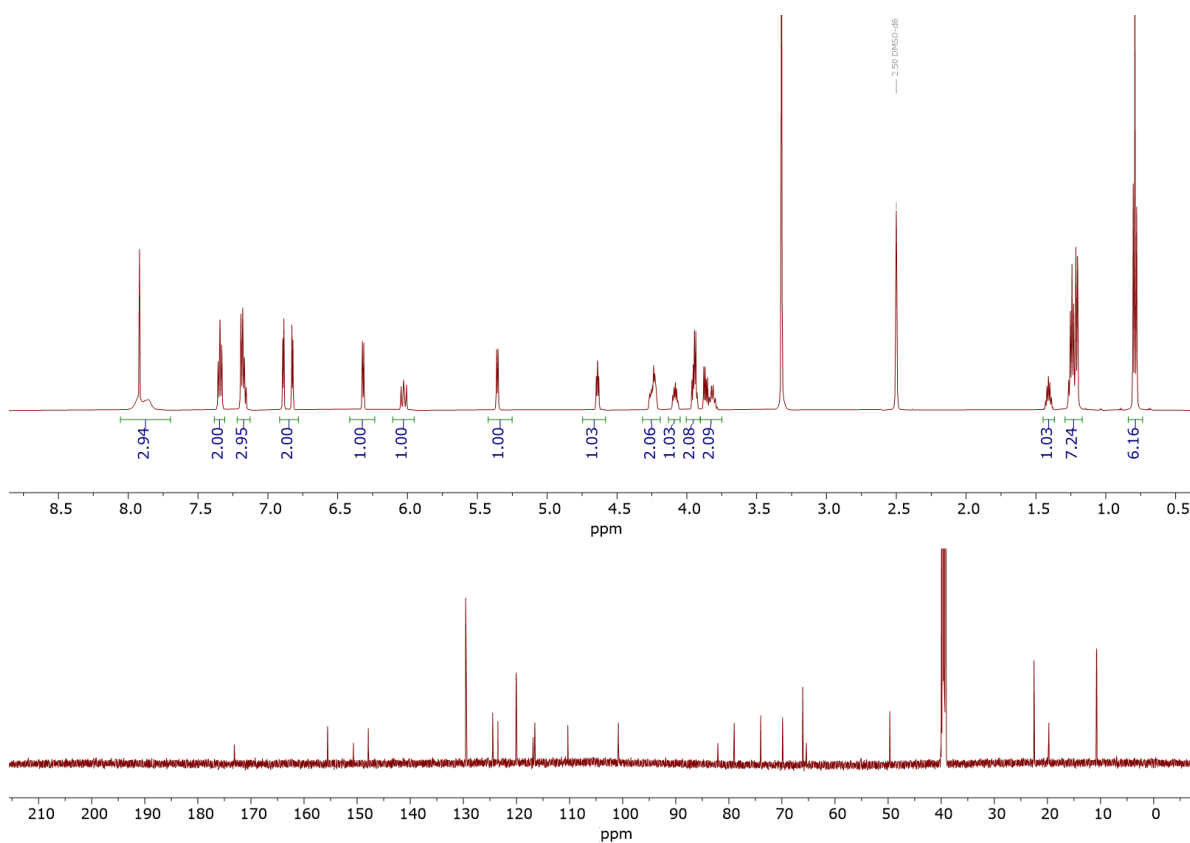

**Figure S1.**  $^1\text{H}$  and  $^{13}\text{C}$  NMR spectra of remdesivir ( $\text{DMSO-}d_6$ , 600 MHz).

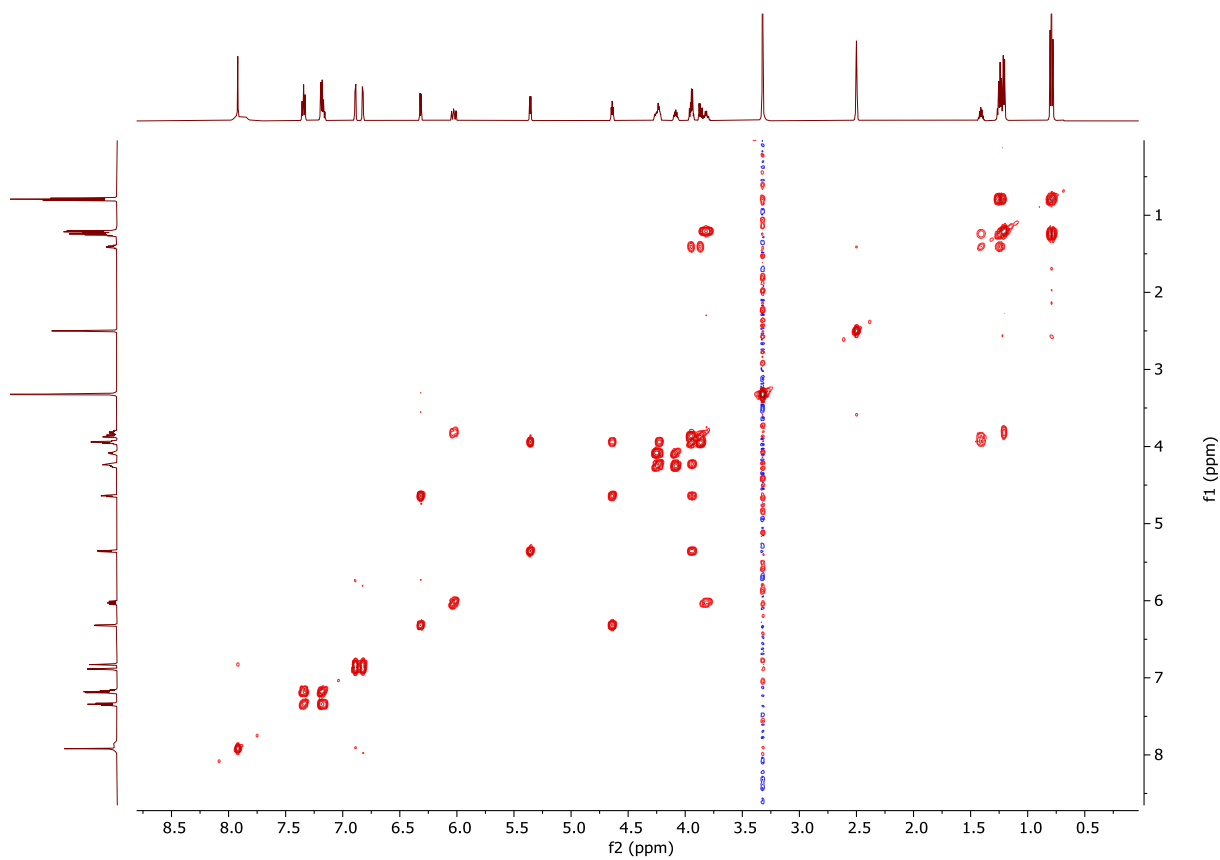

**Figure S2.** COSY spectrum of remdesivir ( $\text{DMSO-}d_6$ , 600 MHz).

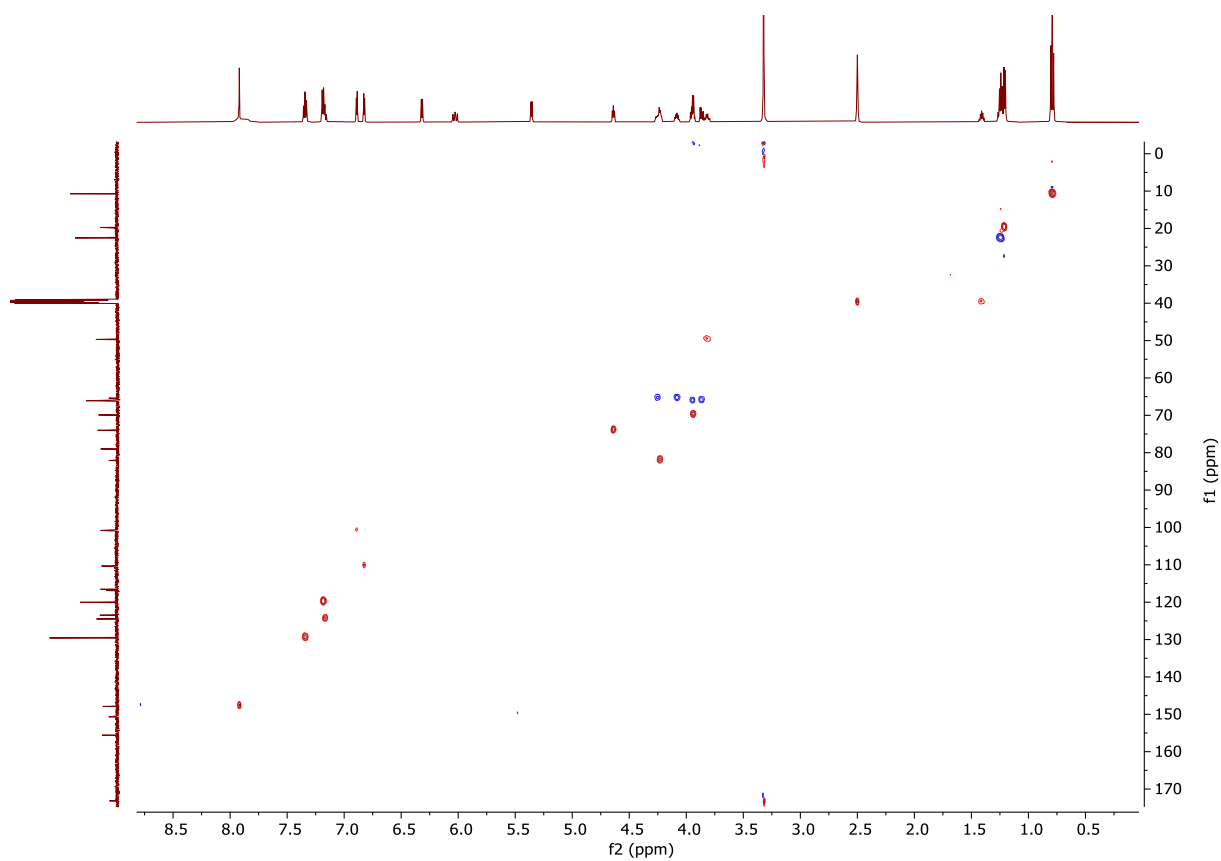

**Figure S3.** DEPT-edited HSQC spectrum of remdesivir (DMSO- $d_6$ , 600 MHz).

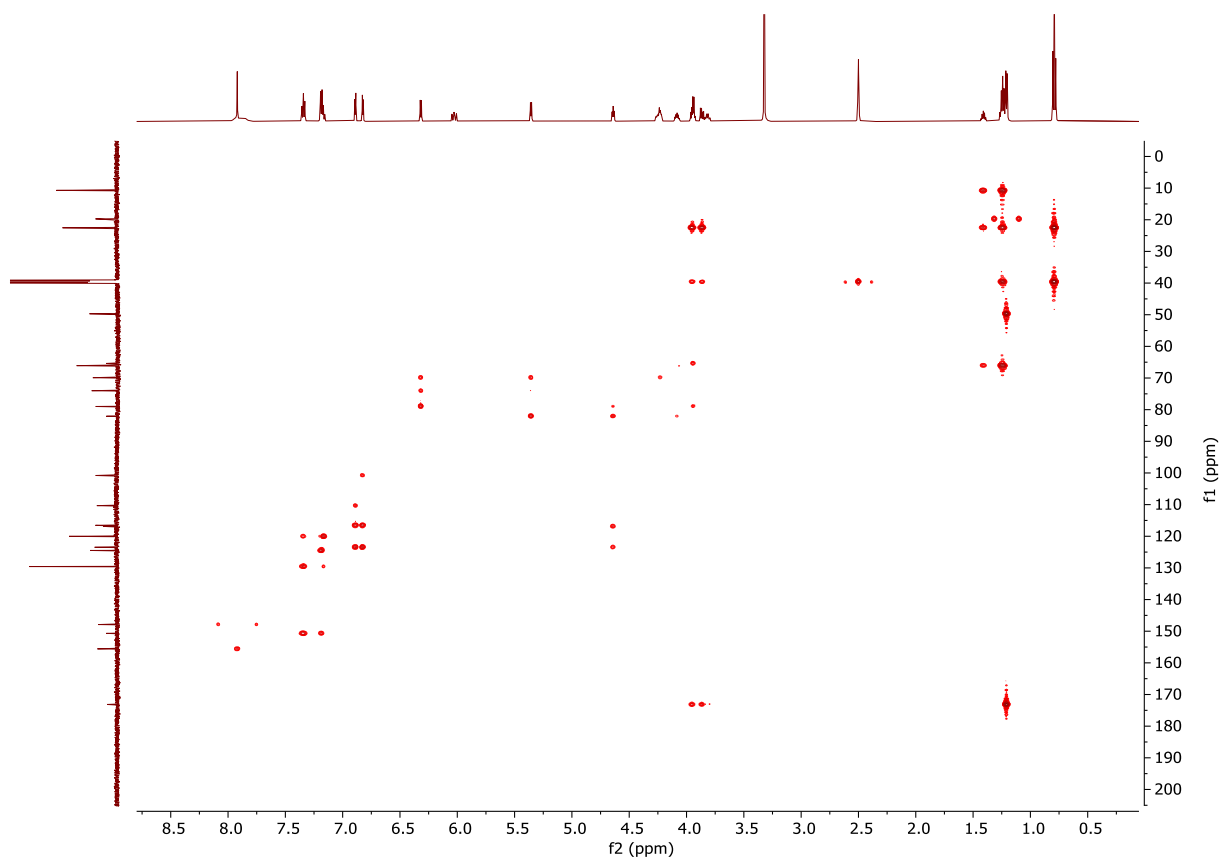

**Figure S4.** HMBC spectrum of remdesivir (DMSO- $d_6$ , 600 MHz).

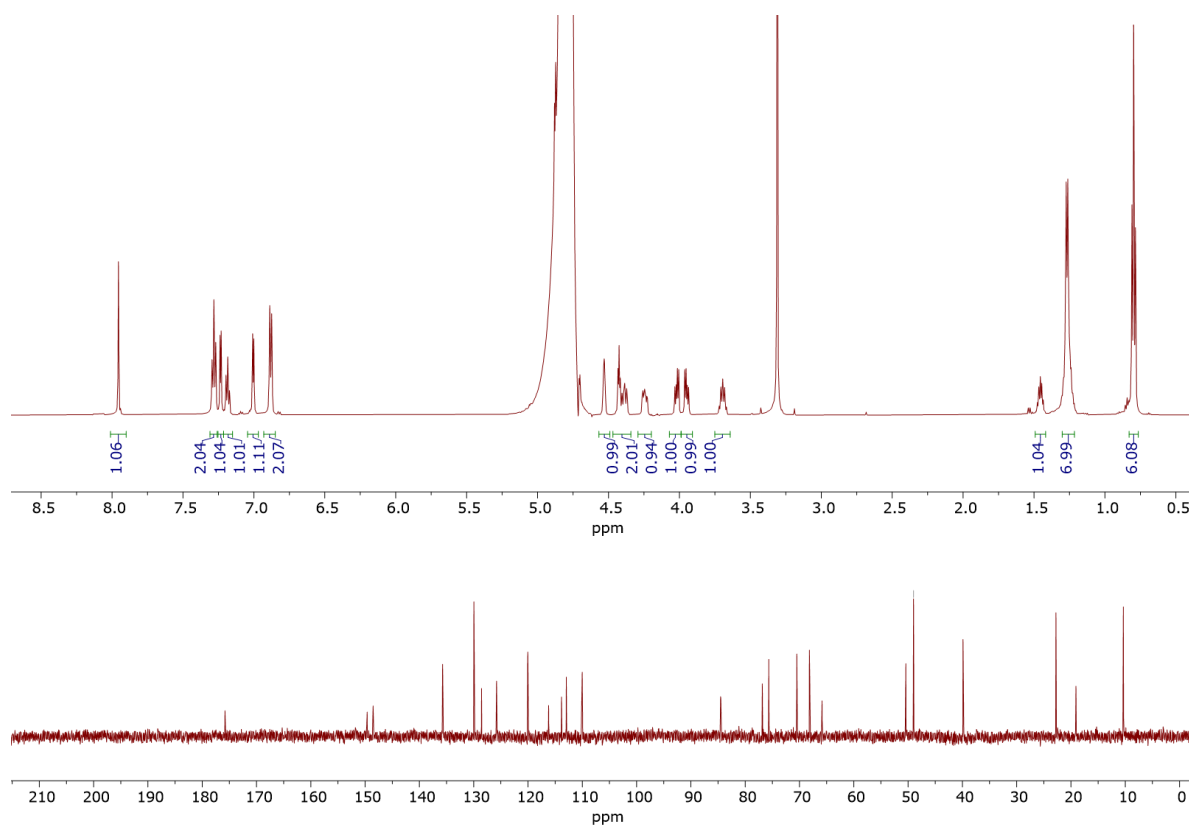

**Figure S5.**  $^1\text{H}$  and  $^{13}\text{C}$  NMR spectra of remdesivir ( $\text{D}_2\text{O}$ , pH 2.0, 600 MHz).

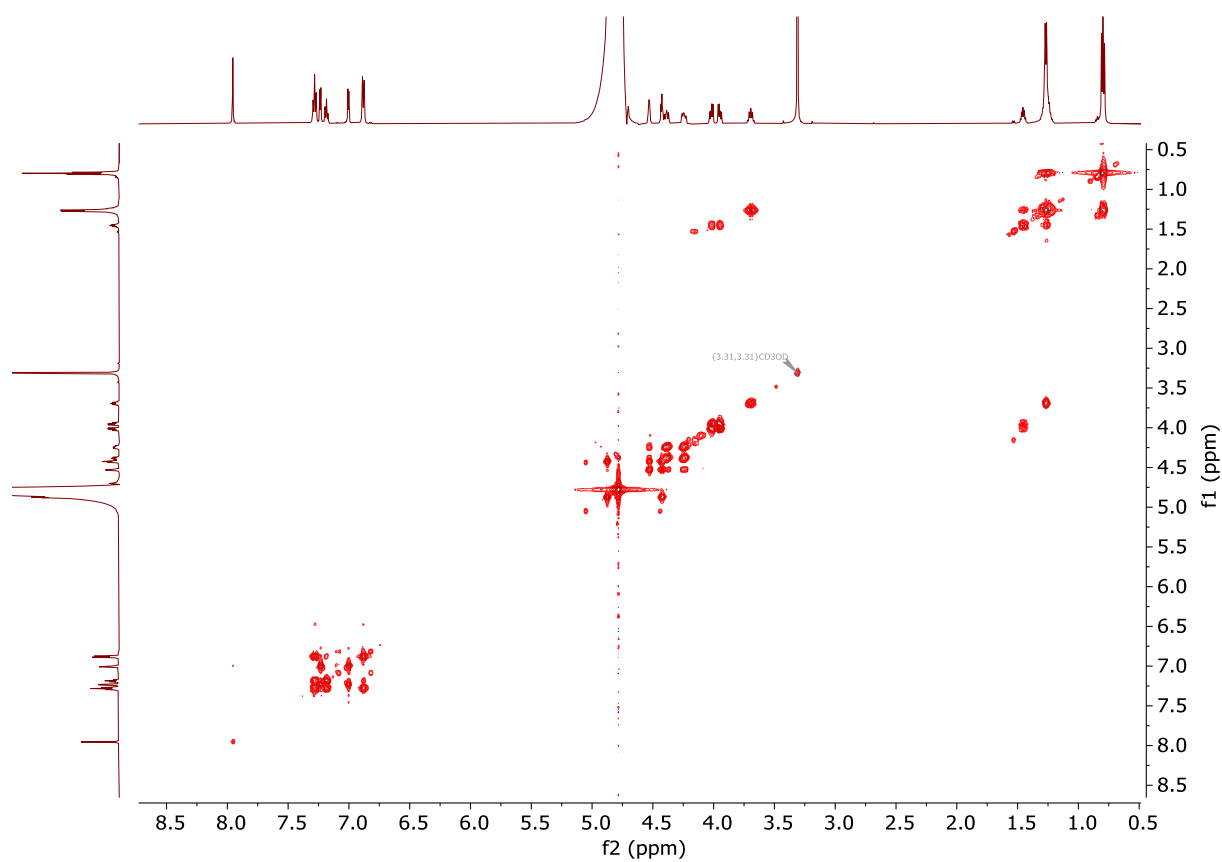

**Figure S6.** COSY spectrum of remdesivir ( $\text{D}_2\text{O}$ , pH 2.0, 600 MHz).

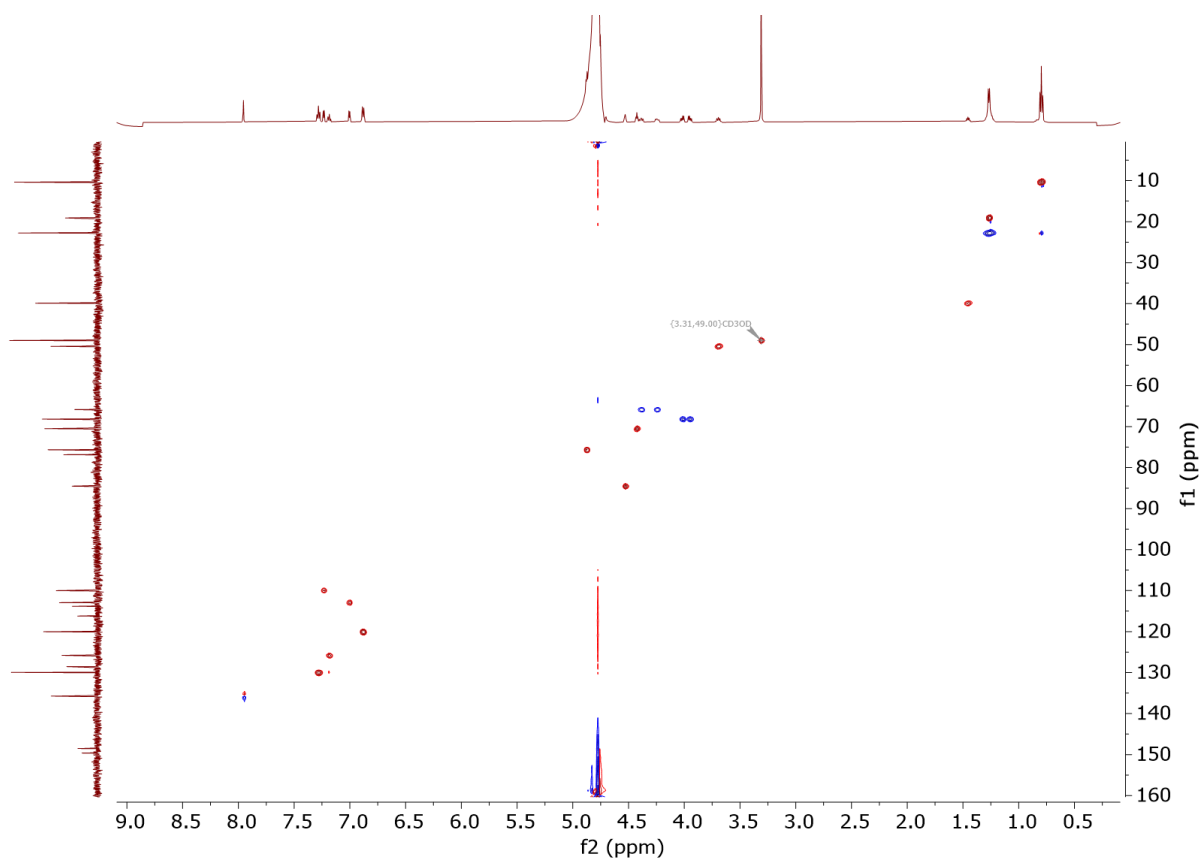

**Figure S7.** DEPT-edited HSQC spectrum of remdesivir ( $D_2O$ , pH 2.0, 600 MHz).

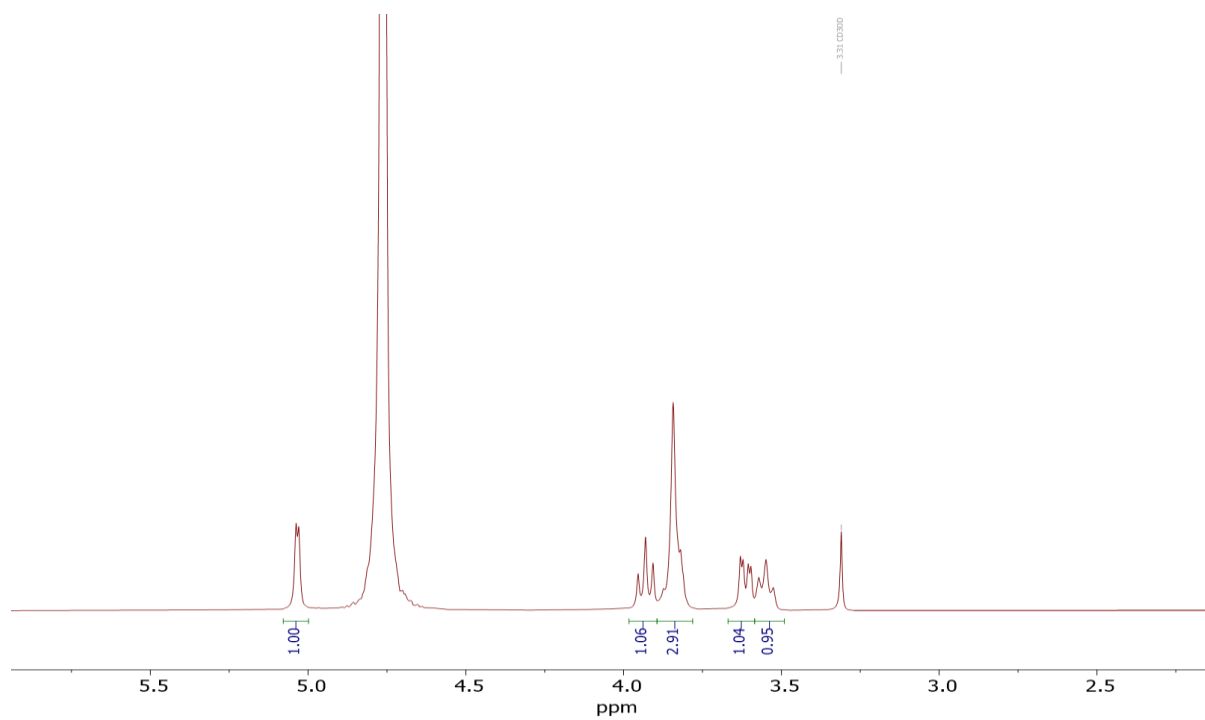

**Figure S8.**  $^1H$  NMR spectrum of  $\beta$ CD ( $D_2O$ , pH 2.0, 400 MHz).



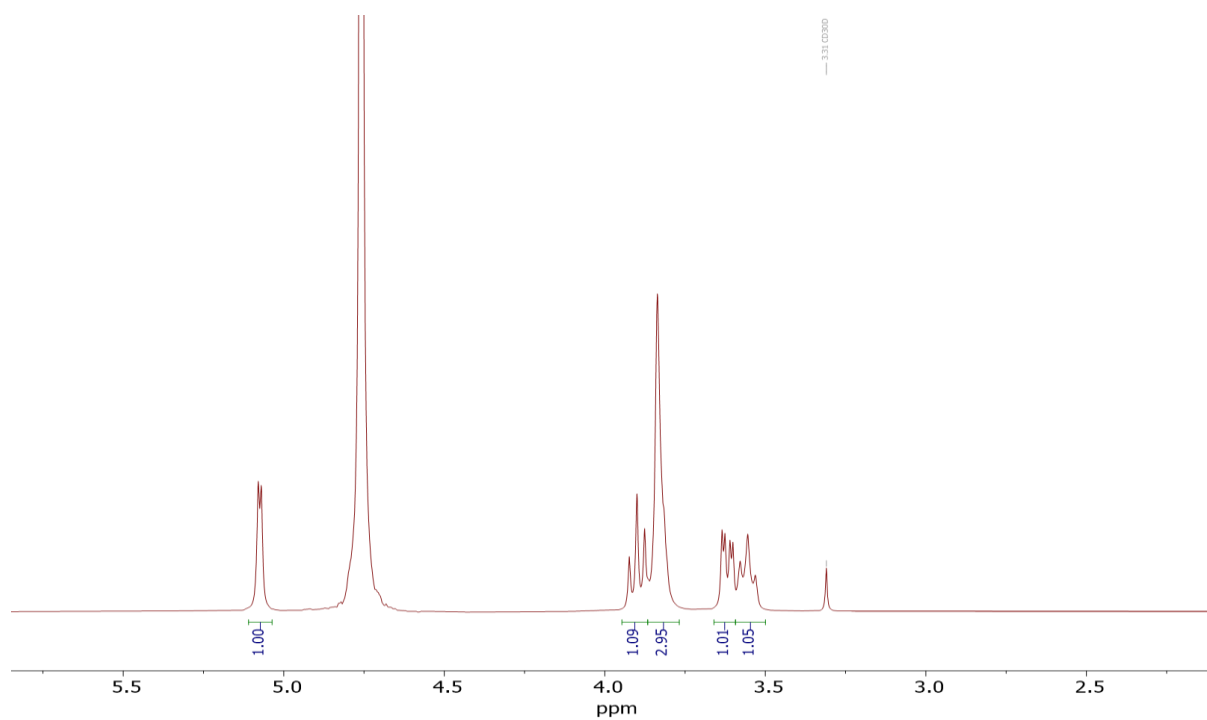

**Figure S9.**  $^1\text{H}$  NMR spectrum of  $\gamma\text{CD}$  ( $\text{D}_2\text{O}$ , pH 2.0, 400 MHz).

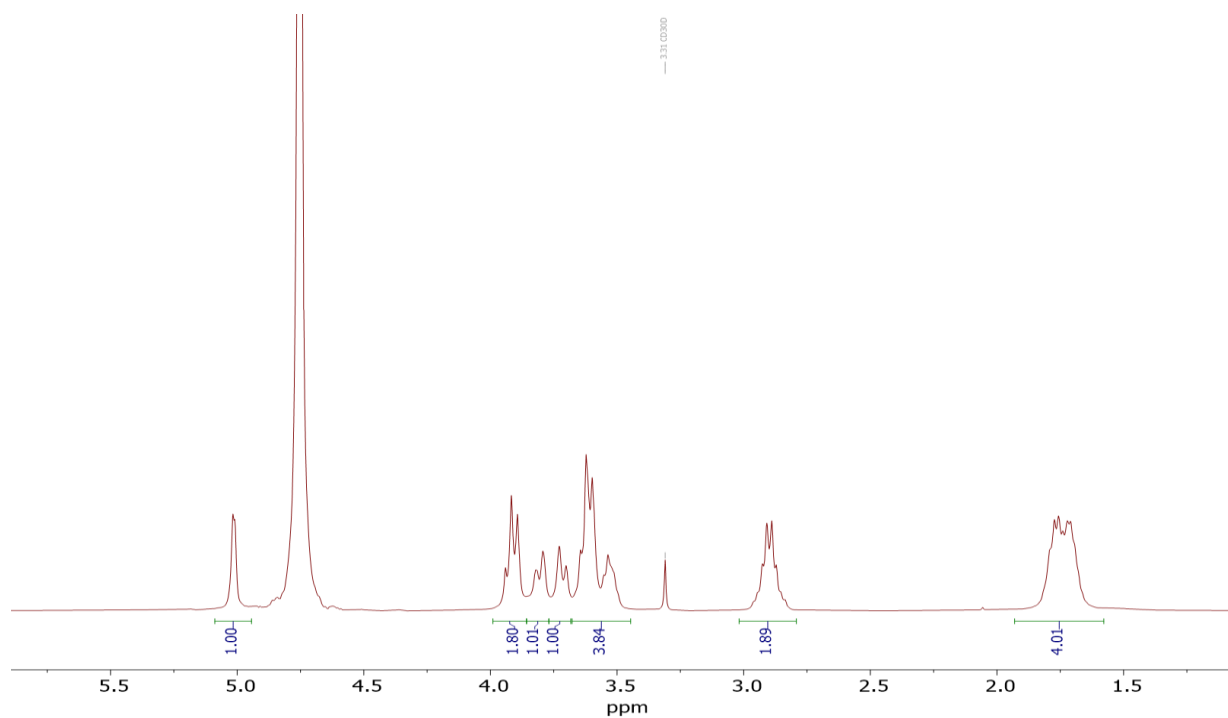

**Figure S10.**  $^1\text{H}$  NMR spectrum of per-6-SBE $\beta$ CD ( $\text{D}_2\text{O}$ , pH 2.0, 400 MHz).

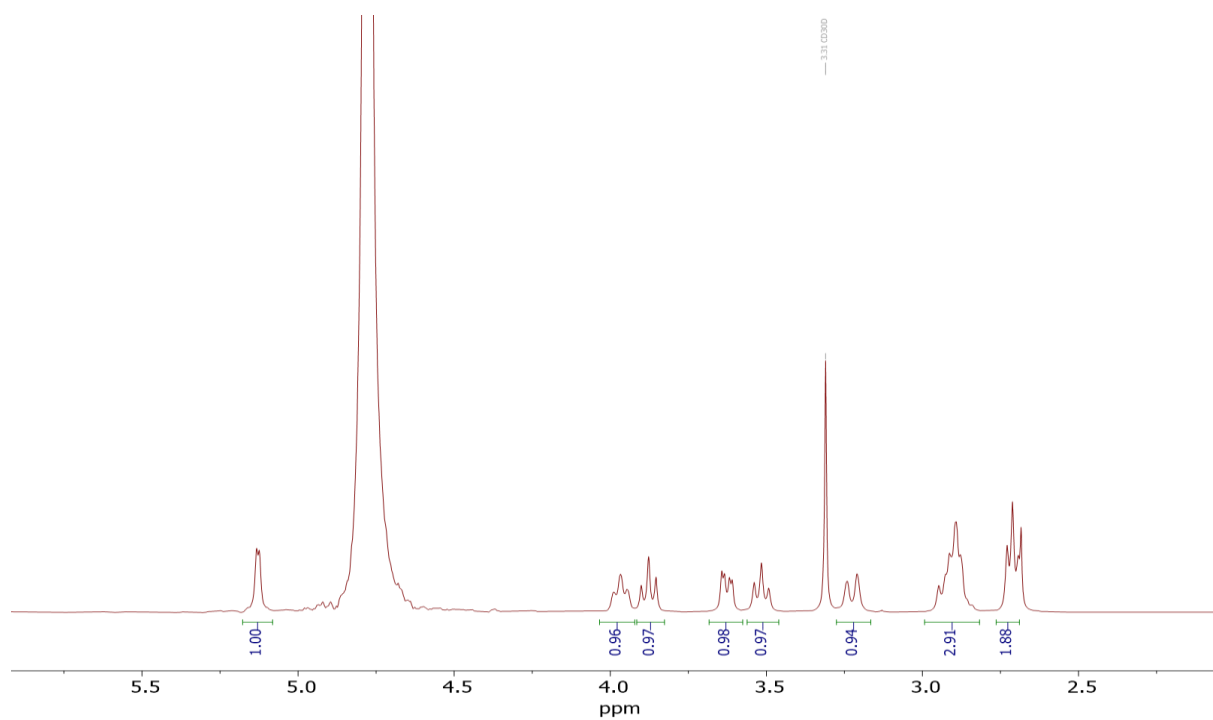

**Figure S11.**  $^1\text{H}$  NMR spectrum of sugammadex ( $\text{D}_2\text{O}$ , pH 2.0, 400 MHz).

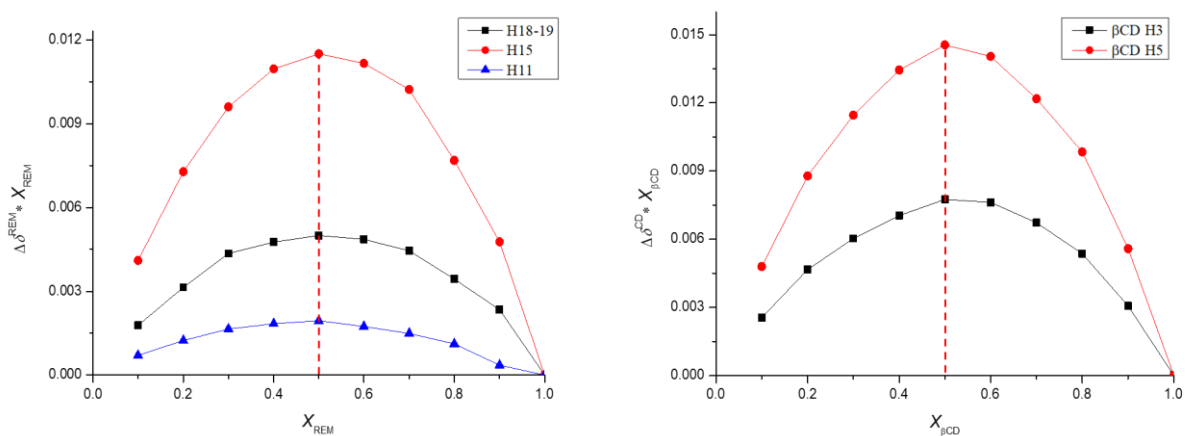

**Figure S12.** Job's plot for the selected  $^1\text{H}$  resonances of REM (left) and  $\beta\text{CD}$  (right) both showing maximum at 0.5, that suggest 1:1 molar ratio for the complex in aqueous solution at pH 2.0.

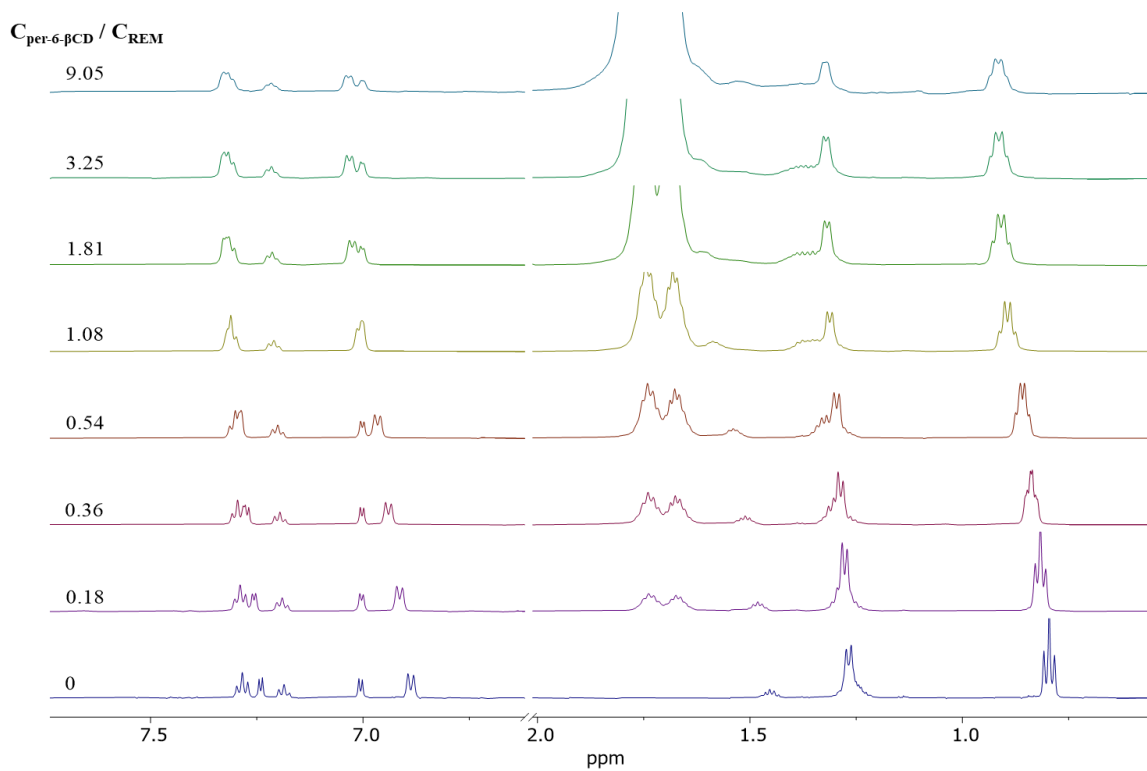

**Figure S13.** Representative  $^1\text{H}$  NMR chemical shift changes of REM upon titration with per-6-SBE $\beta$ CD.

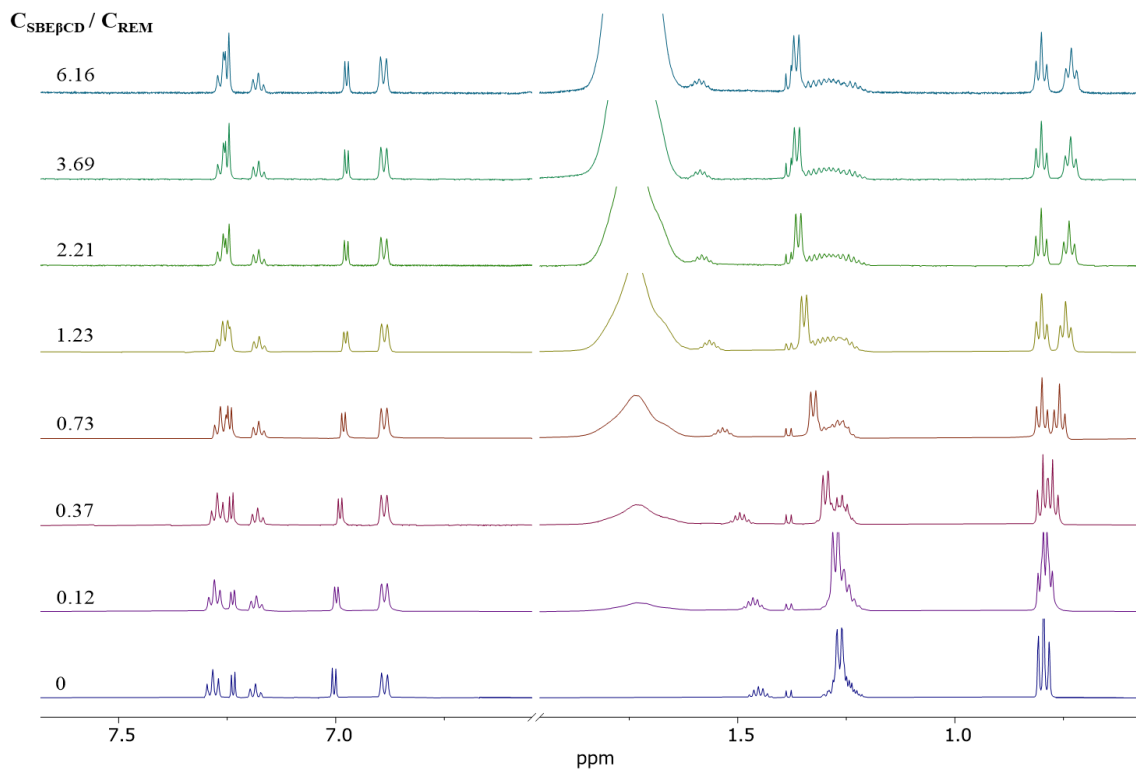

**Figure S14.** Representative  $^1\text{H}$  NMR chemical shift changes of REM upon titration with SBE $\beta$ CD.

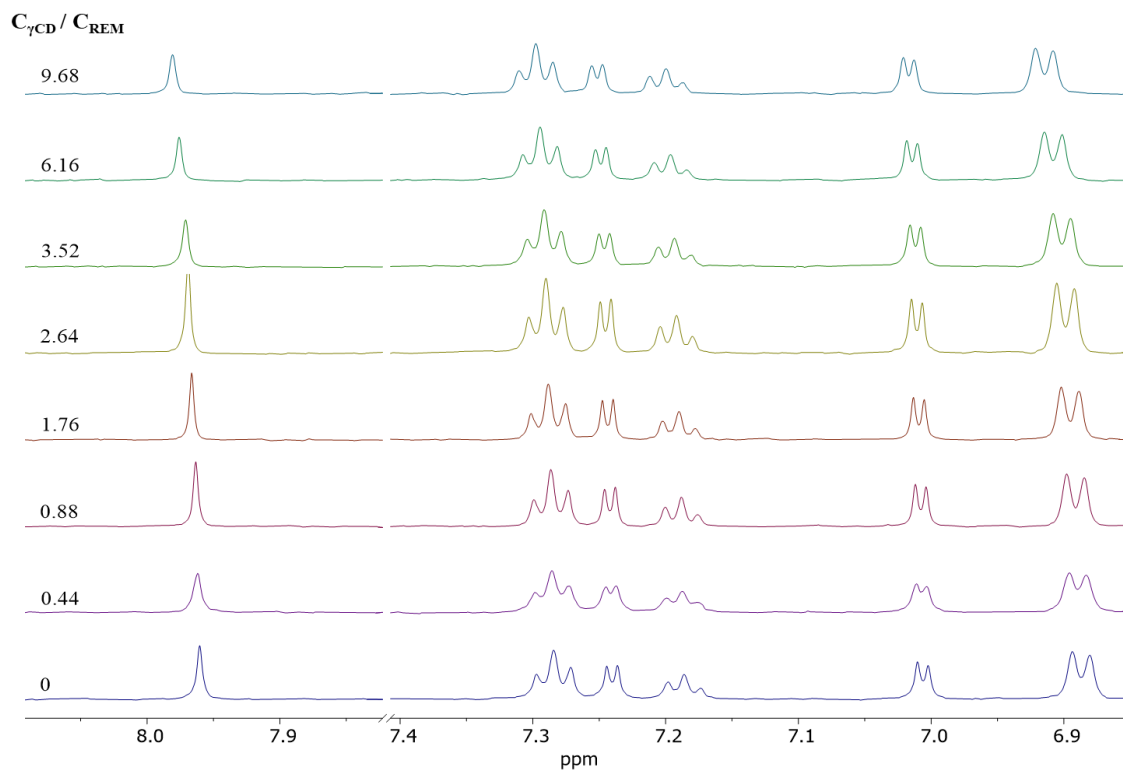

**Figure S15.** Representative  $^1\text{H}$  NMR chemical shift changes of REM upon titration with  $\gamma\text{CD}$ .

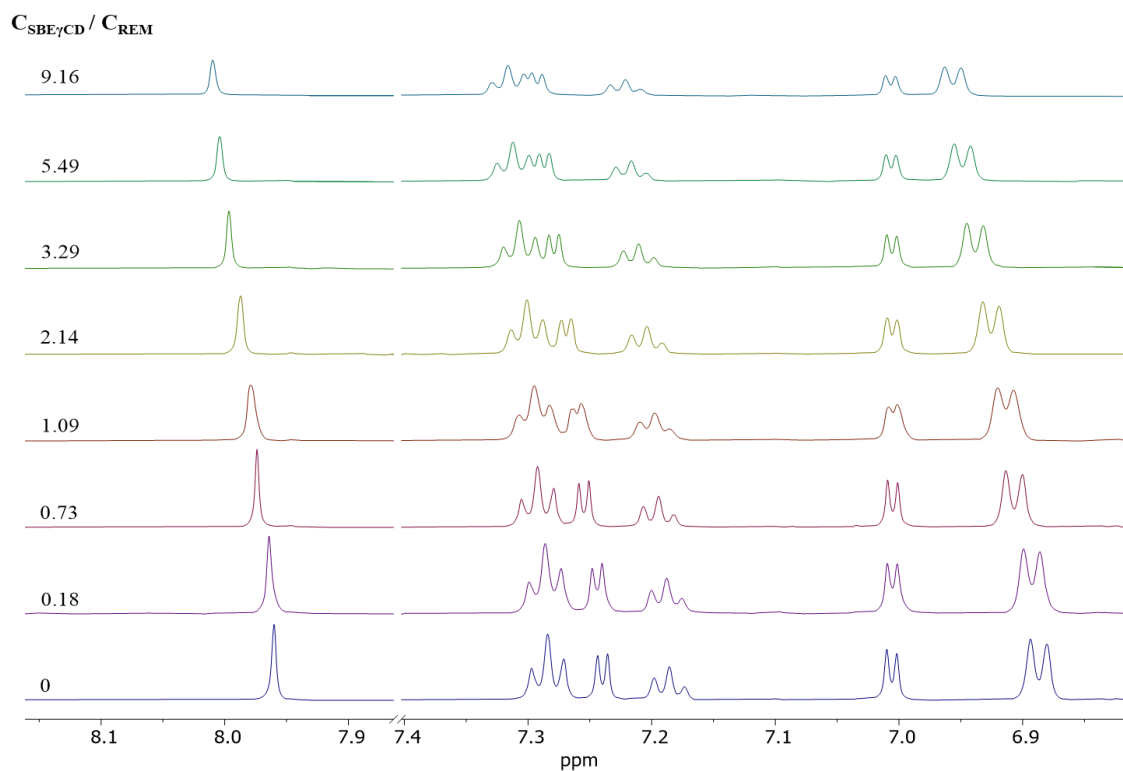

**Figure S16.** Representative  $^1\text{H}$  NMR chemical shift changes of REM upon titration with  $\text{SBE}\gamma\text{CD}$ .

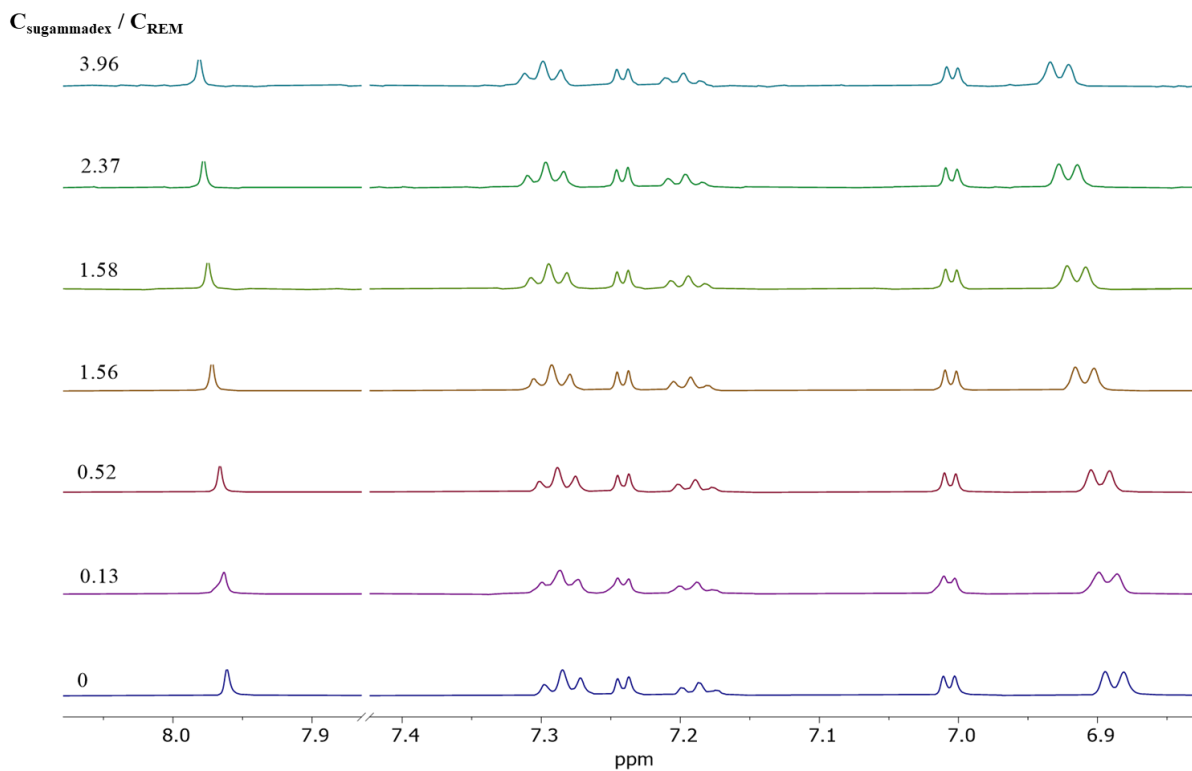

**Figure S17.** Representative  $^1\text{H}$  NMR chemical shift changes of REM upon titration with sugammadex.

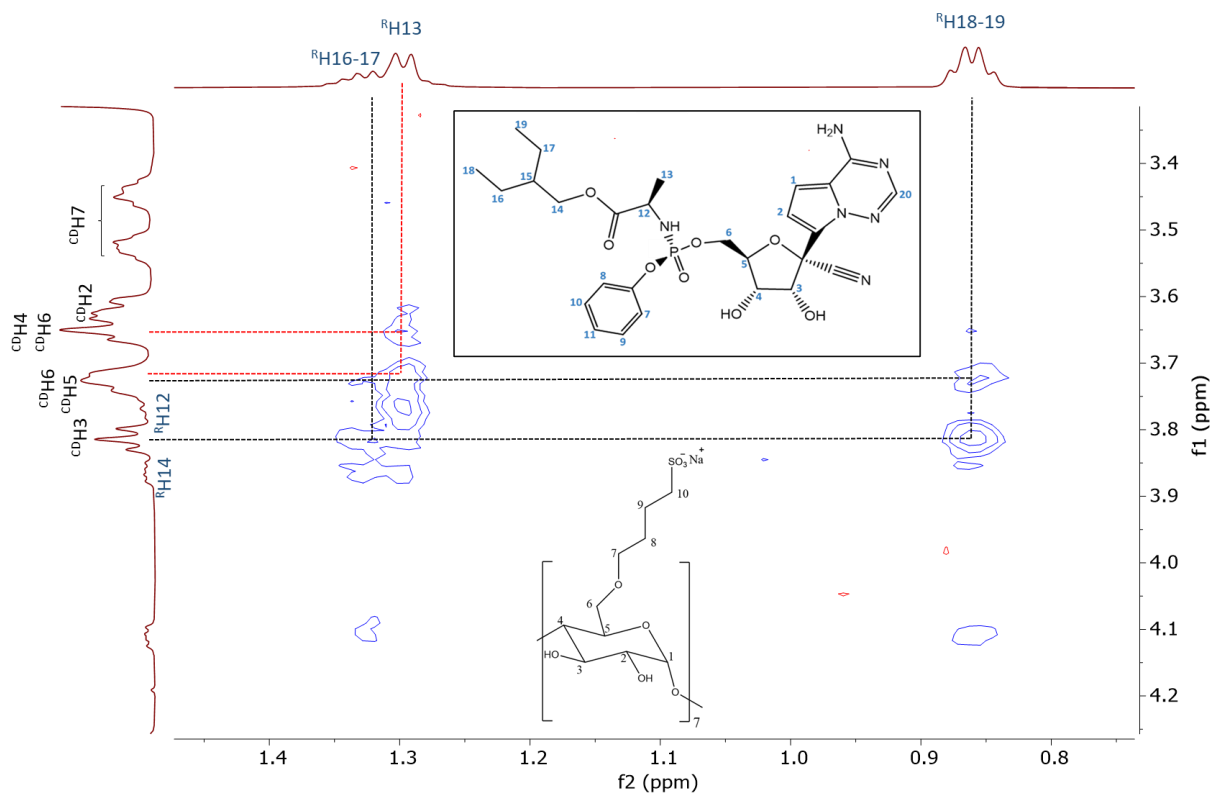

**Figure S18.** 2D ROESY spectrum of the 1:1 REM:per-6-SBE $\beta$ CD molar ratio sample.

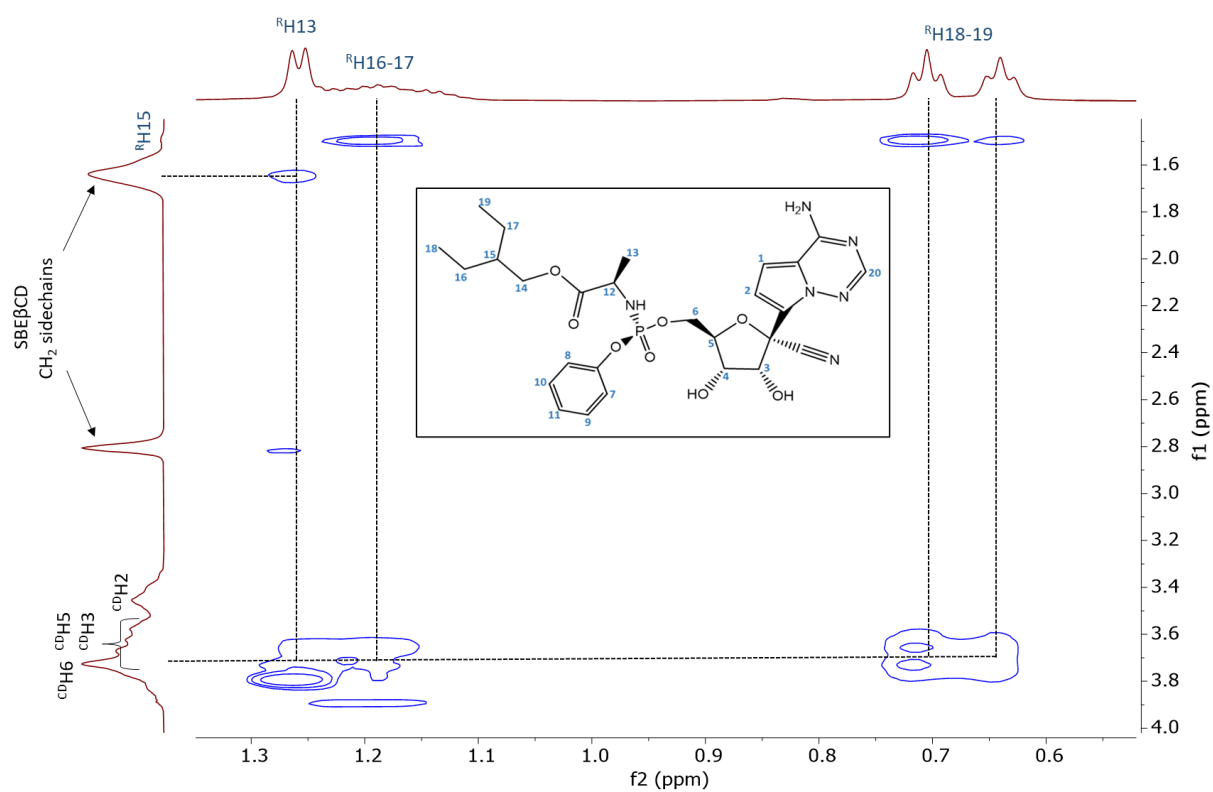

**Figure S19.** Partial 2D ROESY spectrum of the 1:3 REM:SBE $\beta$ CD molar ratio sample.

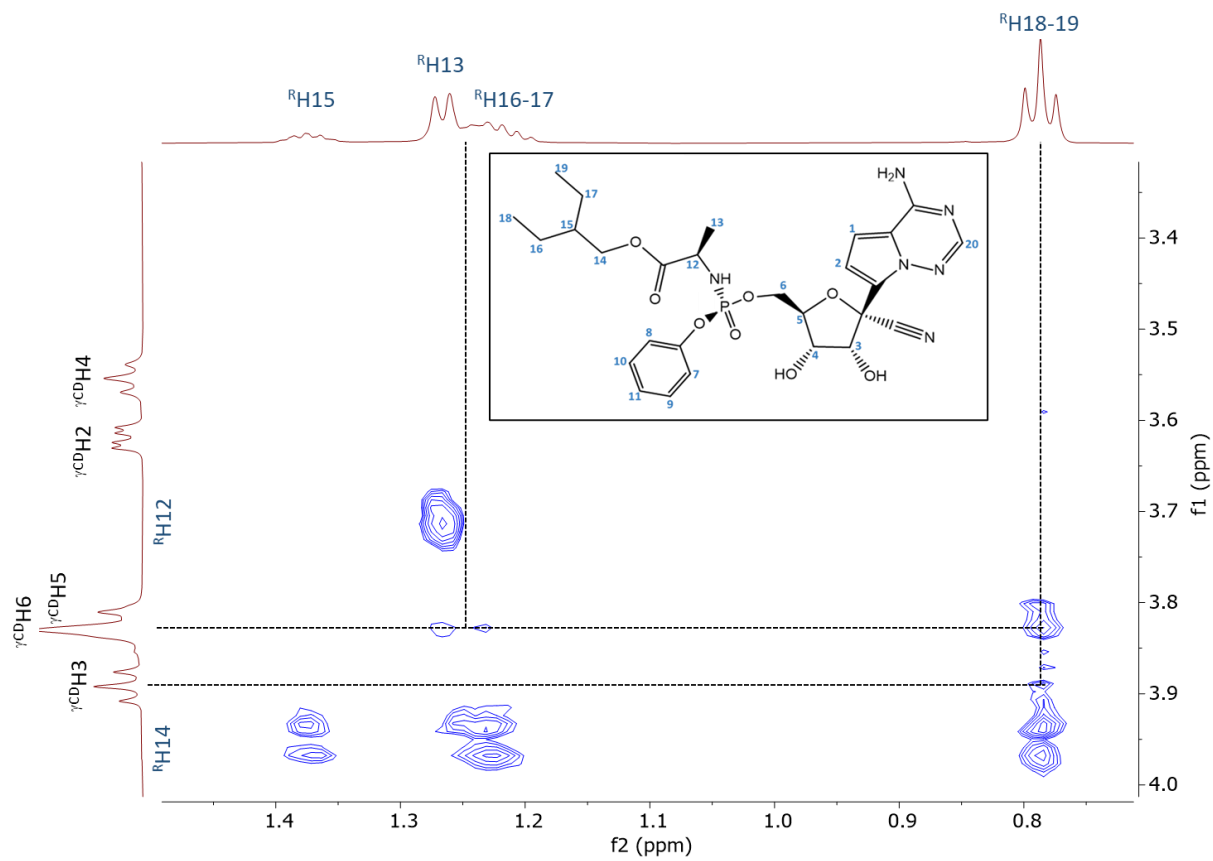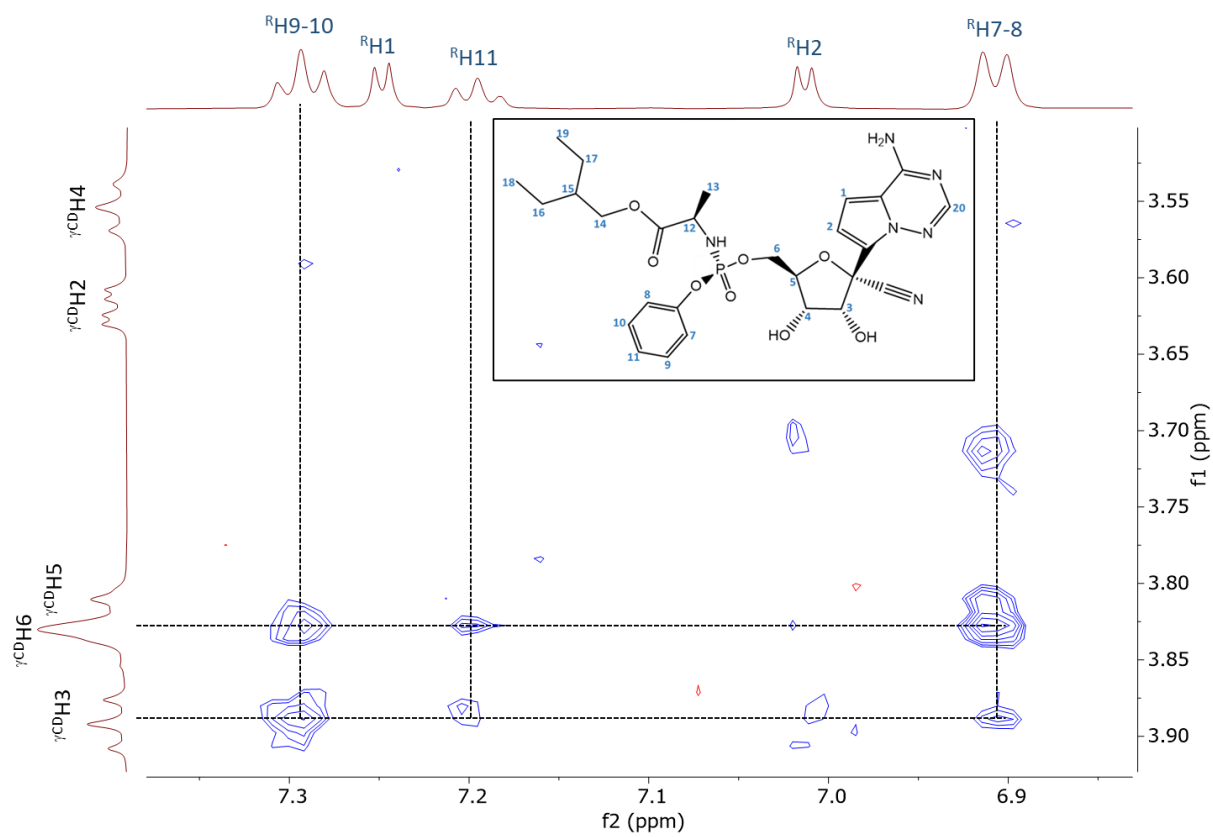

**Figure S20.** Partial 2D ROESY spectra of the 1:3 REM: $\gamma$ CD molar ratio sample.

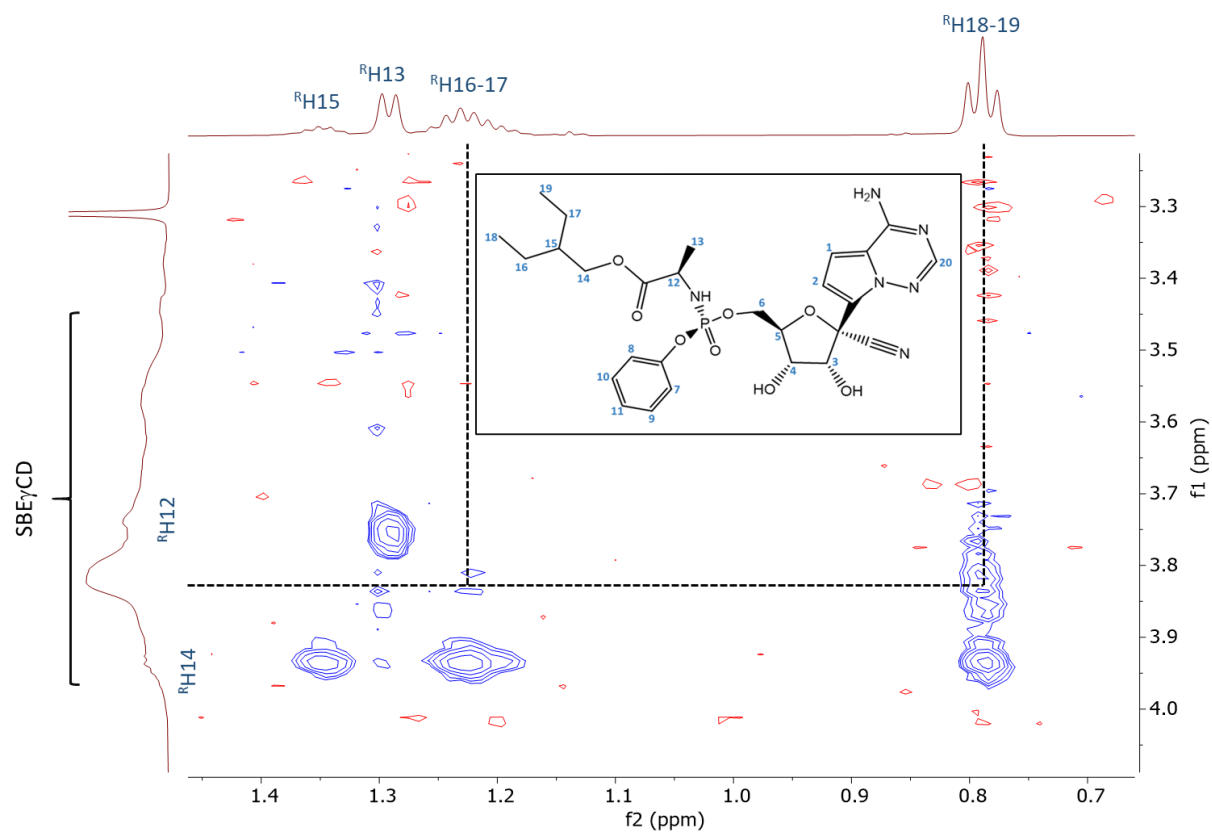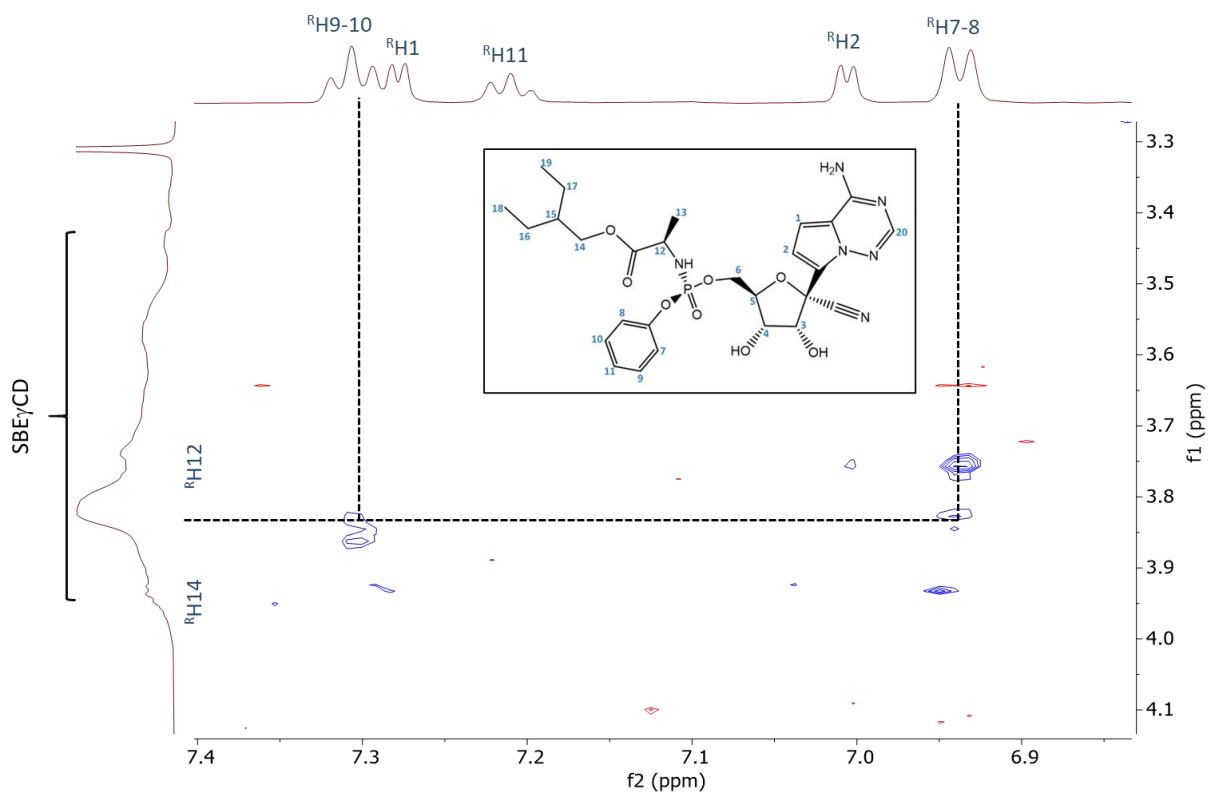

**Figure S21.** Partial 2D ROESY spectra of the 1:3 REM:SBE<sub>7</sub>CD molar ratio sample.



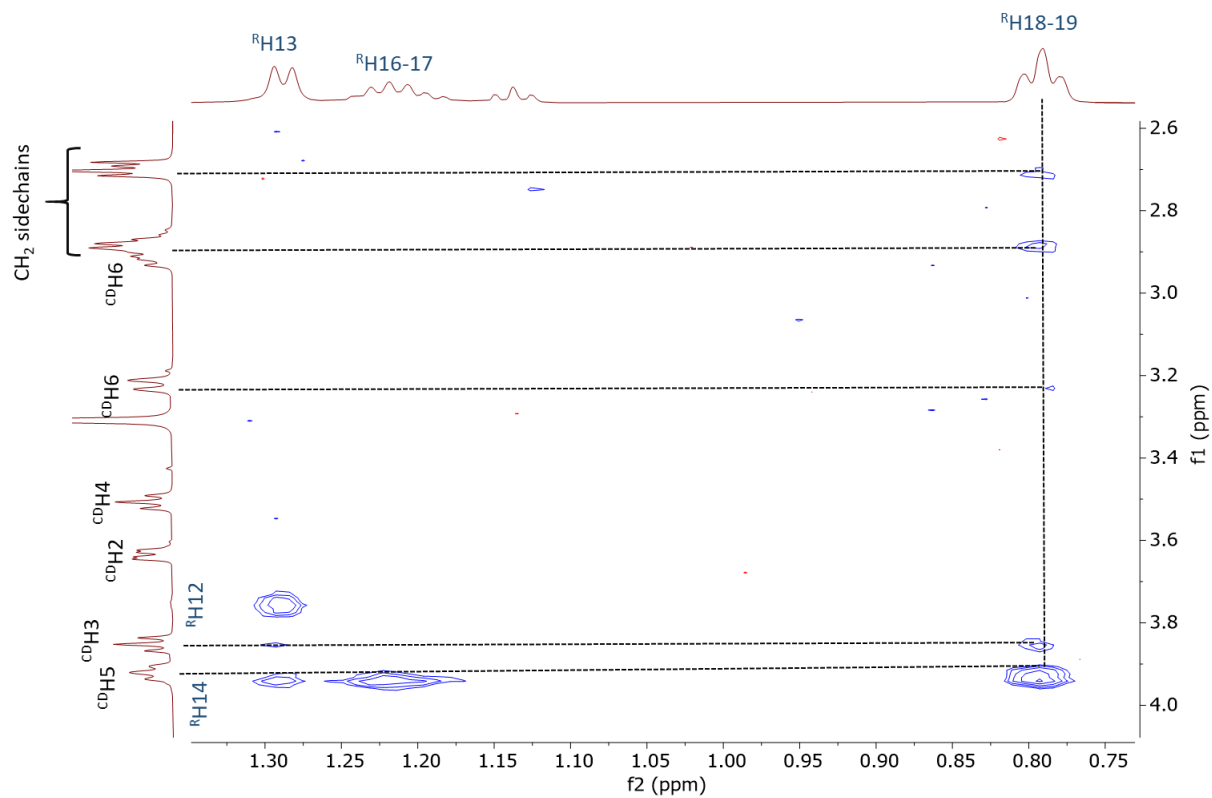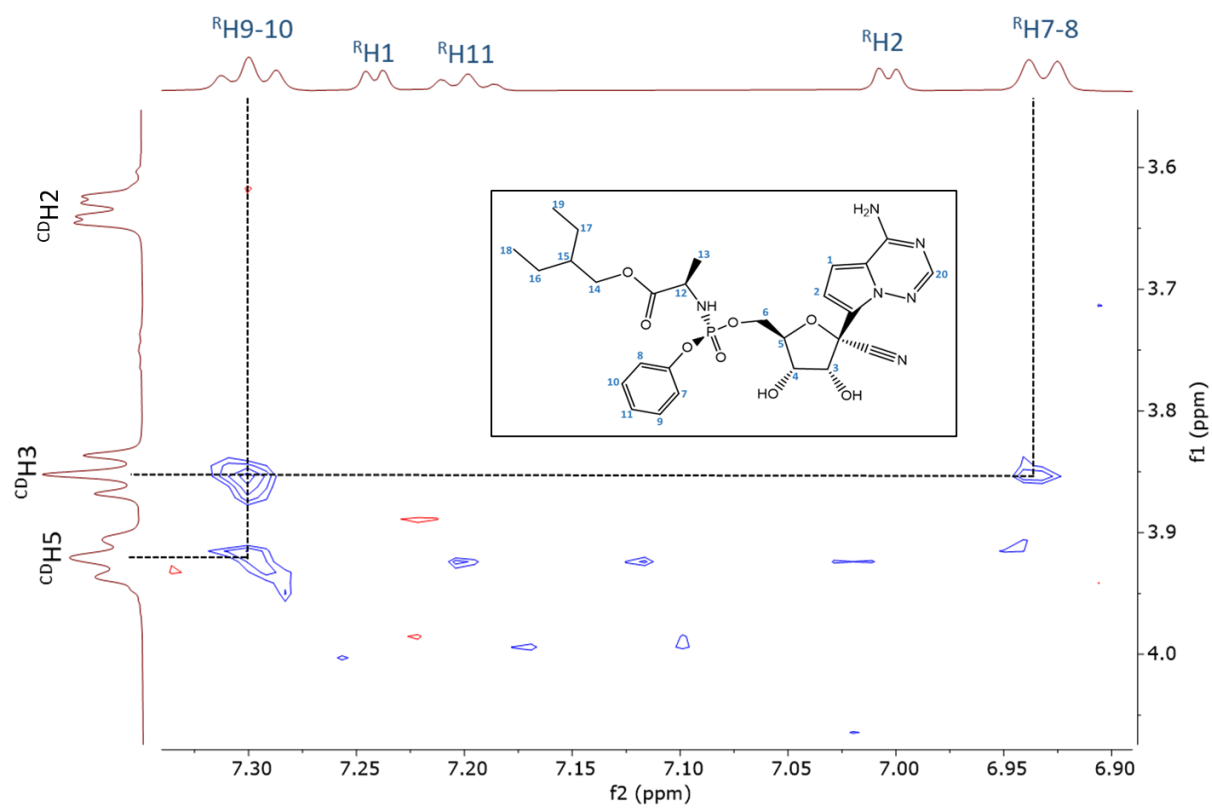

**Figure S22.** Partial 2D ROESY spectra of the 1:2 REM:sugammadex molar ratio sample.
